# Supplementary material for: Ligand-based backbone modifications for metal-chelating nucleic acids
Source: Royal Society of Chemistry journal article supplement (doi:10.1039/b704741j), 2007-01-01
Supplement: b704741j.pdf [file b704741j.pdf]

**Ligand-Based Backbone Modifications for  
Metal-Chelating Nucleic Acids**

Megan M. Knagge and Jonathan J. Wilker\*

*Department of Chemistry, Purdue University  
560 Oval Drive, West Lafayette, Indiana, USA 47907-2084*

**Section I.** Synthesis of protected ligands

Scheme S1. Bpy synthesis

Scheme S2. Pip synthesis

Scheme S3. Dithio synthesis

**Section II.** Oligonucleotide synthesis

Table S1. Mass spectral data for oligos

**Section III.** UV-vis melting curves

## Section I. Synthesis of Protected Ligands

### General Procedures

Proton and phosphorous NMR spectra were recorded on a Varian Inova 300 spectrometer. MALDI and ESI mass spectrometry were performed at Purdue University in-house facilities. All reactions were carried out under argon.

### Scheme S1. Bpy synthesis

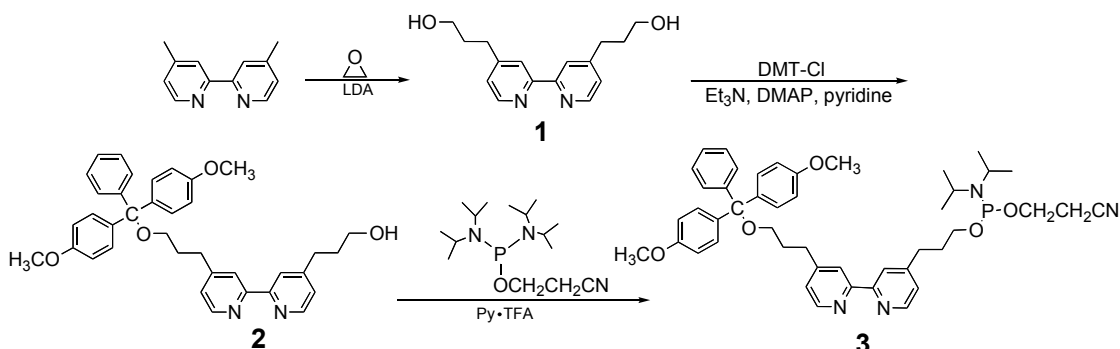

**Compound 1.** 4,4'-Dimethyl-2,2'-dipyridyl (12.0, 65.2 mmol) was dissolved in dry THF (250 mL) with heating. In a separate flask, diisopropylamine (21.0 mL, 0.150 mol) was dissolved in anhydrous THF (50 mL) and chilled to  $-80^{\circ}\text{C}$ . Butyllithium (2.5 M solution in hexanes, 60.0 mL, 0.150 mol) was added slowly to the diisopropylamine solution. The reaction mixture was warmed to  $0^{\circ}\text{C}$ . After stirring for 20 minutes, the reaction was returned to  $-80^{\circ}\text{C}$ . The dipyrindyl solution was then added dropwise to the freshly prepared lithium diisopropylamide solution. After stirring for 2 hours at  $-80^{\circ}\text{C}$ , the reaction was warmed to  $0^{\circ}\text{C}$ . Ethylene oxide (81.0 mL, 1.62 mol) was added slowly. The reaction was warmed to room temperature and stirred overnight. The reaction was then quenched with saturated aqueous  $\text{NH}_4\text{Cl}$  and extracted with  $\text{CH}_2\text{Cl}_2$  (3 x 100 mL). The combined organic layers were washed twice with saturated aqueous  $\text{NaCl}$ , dried over  $\text{Na}_2\text{SO}_4$ , and concentrated in vacuo. The crude product was purified by flash chromatography using a solvent gradient of 2% to 15% methanol in  $\text{CH}_2\text{Cl}_2$ . Yield 6.5 g (37%).  $^1\text{H}$  NMR ( $\text{CDCl}_3$ , ppm): 1.92-2.01 (m, 6H), 2.79-2.84 (t,  $J = 13.48$  Hz, 6H), 3.67-3.71 (t,  $J = 12.59$  Hz, 6H), 7.16-7.18 (d,  $J = 10.4$  Hz, 2H), 8.25 (s, 2H), 8.55-8.57 (d,  $J = 4.8$  Hz, 2H). MALDI-TOF ( $m/z$ ):  $[\text{M}+\text{H}]^+$  calc'd for **1**, 273.17, found, 273.07.

**Compound 2.** *N,N*-Dimethylaminopyridine (DMAP) (72 mg, 0.59 mmol) and  $\text{Et}_3\text{N}$  (2.0 mL, 14 mmol) were added to a solution of **1** (2.8 g, 0.010 mol) in dry pyridine (40 mL) at room temperature. 4,4'-Dimethoxytrityl chloride (DMT-Cl) (0.73 g, 2.2 mmol) was added to the reaction mixture slowly. The reaction was stirred for 36 hours at room temperature. The solvent was removed in vacuo and the residue dissolved in  $\text{CH}_2\text{Cl}_2$  (100 mL). The solution was poured into water and extracted with  $\text{CH}_2\text{Cl}_2$  (3 x 50 mL). The organic layers were combined and washed twice with saturated aqueous  $\text{NaCl}$ , dried over  $\text{Na}_2\text{SO}_4$ , and concentrated in vacuo. The crude product was purified by flash chromatography using a solvent gradient of 10% hexanes in EtOAc to 100% EtOAc to 0.5% triethylamine in 100% EtOAc. Yield 0.31 g (29%).  $^1\text{H}$  NMR ( $\text{CDCl}_3$ , ppm): 1.88-

# Supplementary Material (ESI) for Chemical Communications  
# This journal is (c) The Royal Society of Chemistry 2007

1.98 (m, 4H), 2.72-2.79 (m, 4H), 3.03-3.07 (t,  $J = 12.31$  Hz, 2H), 3.62-3.66 (t,  $J = 12.31$  Hz, 2H), 3.71 (s, 6H), 6.72-6.75 (d,  $J = 8.79$  Hz, 4H), 6.99-7.00 (d,  $J = 1.76$  Hz, 2H), 7.02-7.20 (m, 3H), 7.23-7.26 (d,  $J = 8.79$  Hz, 4H), 7.35-7.37 (d,  $J = 7.03$  Hz, 2H), 8.18 (s, 2H), 8.42-8.51 (d,  $J = 24.6$  Hz, 2H). MALDI-TOF ( $m/z$ ):  $[M+H]^+$  calc'd for **2**, 575.29, found, 575.15.

**Compound 3.** (2-Cyanoethyl)-*N,N,N',N'*-tetraisopropylphosphorodiamidite (0.26 g, 0.81 mmol) was added to a solution of **2** (0.33 g, 0.58 mmol) in anhydrous  $\text{CH}_2\text{Cl}_2$  (20 mL). Pyridinium trifluoroacetate (0.13 g, 0.81 mmol) was co-evaporated with  $\text{CH}_2\text{Cl}_2$  (2 x 20 mL) and added to the reaction mixture. The reaction was stirred for 3 hours at room temperature. The reaction mixture was poured into water and extracted with  $\text{CH}_2\text{Cl}_2$  (2 x 30 mL). The organic layers were combined, washed twice with saturated aqueous NaCl, dried over  $\text{Na}_2\text{SO}_4$ , and concentrated in vacuo. The crude product was purified by flash chromatography using a solvent gradient of 1:1 EtOAc/hexanes to 7:1 EtOAc/hexanes. Yield 0.18 g (40%),  $^1\text{H}$  NMR ( $\text{CDCl}_3$ , ppm): 1.09-1.13 (m, 12H), 1.89-1.94 (m, 4H), 2.55-2.59 (t,  $J = 12.74$  Hz, 2H), 2.71-2.78 (m, 4H), 3.02-3.06 (t,  $J = 11.86$  Hz, 2H), 3.50-3.64 (m, 4H), 3.70 (s, 6H), 3.79-3.83 (m, 2H), 6.72-6.75 (d,  $J = 8.35$  Hz, 4H), 6.99-7.01 (d,  $J = 4.84$  Hz, 2H), 7.01-7.20 (m, 3H), 7.24-7.26 (d,  $J = 8.5$  Hz, 4H), 7.35-7.38 (d,  $J = 7.91$  Hz, 2H), 8.17 (s, 2H), 8.42-8.50 (d,  $J = 24.46$  Hz, 2H).  $^{31}\text{P}$  NMR ( $\text{CDCl}_3$ , ppm): 148.05. ESI ( $m/z$ ):  $[M+H]^+$  calc'd for **3**, 775.40, found, 774.96.

### Scheme S2. Pip synthesis

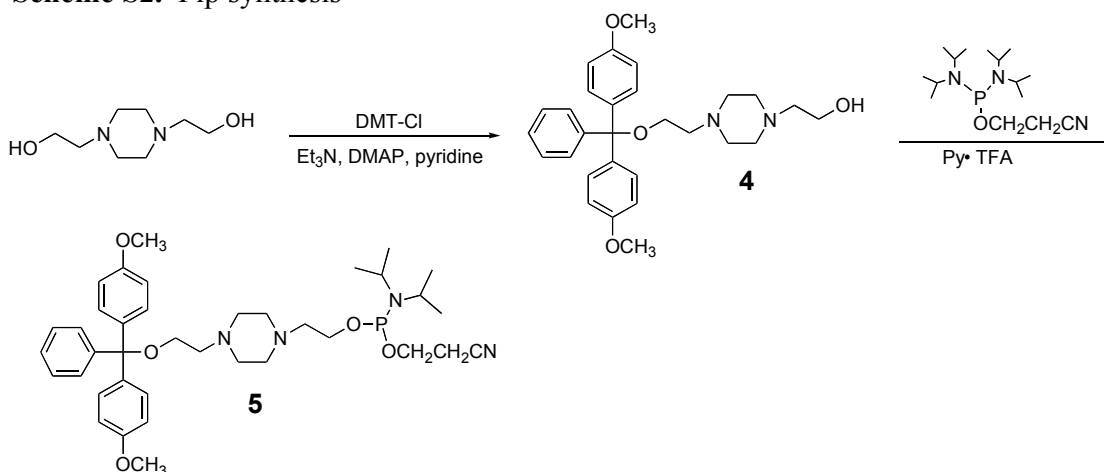

**Compound 4.** *N,N'*-Bis(hydroxyethyl)piperazine (12.3 g, 70.5 mmol),  $\text{Et}_3\text{N}$  (13.7 mL, 98.7 mmol), and DMAP (0.4 g, 4 mmol) were dissolved in dry pyridine (150 mL). To this reaction mixture, DMT-Cl (11.9 g, 35.3 mmol) was slowly added. This reaction was stirred overnight at room temperature. The reaction mixture was then poured into aqueous 5%  $\text{NaHCO}_3$  and extracted with  $\text{CH}_2\text{Cl}_2$  (2 x 100 mL). The organic layers were combined and washed with saturated aqueous NaCl, dried over  $\text{Na}_2\text{SO}_4$ , and concentrated in vacuo. This crude product was purified by flash chromatography using a solvent gradient from 100%  $\text{CH}_2\text{Cl}_2$  to 5% methanol in  $\text{CH}_2\text{Cl}_2$ . Yield 2.1 g (13%).  $^1\text{H}$  NMR ( $\text{CDCl}_3$ , ppm): 2.65 (s, 8H), 2.70-2.74 (t,  $J = 12.01$  Hz, 4H), 3.28-3.32 (t,  $J = 11.86$  Hz, 2H), 3.68-3.72 (t,  $J = 10.54$  Hz, 2H), 3.86 (s, 6H), 6.88-6.91 (d,  $J = 8.79$  Hz, 4H), 7.27-

# Supplementary Material (ESI) for Chemical Communications  
# This journal is (c) The Royal Society of Chemistry 2007

7.35 (m, 3H), 7.39-7.42 (d,  $J = 8.79$  Hz, 4H), 7.50-7.53 (d,  $J = 7.18$  Hz, 2H). MALDI-TOF ( $m/z$ ):  $[M+Na]^+$  calc'd for **4**, 499.26, found, 499.09.

**Compound 5.** To a mixture of (2-cyanoethyl)-*N,N*-diisopropylchlorophosphoramidite (0.63 mL, 2.82 mmol) and **4** (1.08 g, 2.26 mmol) in anhydrous  $CH_2Cl_2$  (15 mL) was added diisopropylethylamine (1.97 mL, 11.3 mmol). The reaction was stirred at room temperature for 75 minutes. The reaction mixture was then poured into aqueous 5%  $NaHCO_3$  and extracted with  $CH_2Cl_2$  (2 x 25 mL). The organic layers were then combined and washed twice with saturated aqueous NaCl, dried over  $Na_2SO_4$ , and concentrated in vacuo. The crude product was purified by flash chromatography in 8:1 EtOAc/hexanes with 0.5%  $Et_3N$ . Yield, 0.23 g (13%).  $^1H$  NMR ( $CDCl_3$ , ppm): 1.12-1.23 (m, 12H), 2.47-2.59 (m, 14H), 3.14-3.16 (t,  $J = 13.33$  Hz, 2H), 3.31-3.36 (m, 2H), 3.72 (s, 6H), 3.91-4.12 (m, 4H), 6.73-6.76 (d,  $J = 8.79$  Hz, 4H), 7.12-7.21 (m, 3H), 7.24-7.27 (d,  $J = 8.79$  Hz, 4H), 7.35-7.38 (d,  $J = 7.03$  Hz, 2H).  $^{31}P$  NMR ( $CDCl_3$ , ppm): 147.97. ESI ( $m/z$ ):  $[M+H]^+$  calc'd for **5**, 677.38, found, 676.85.

### Scheme S3. Dithio synthesis

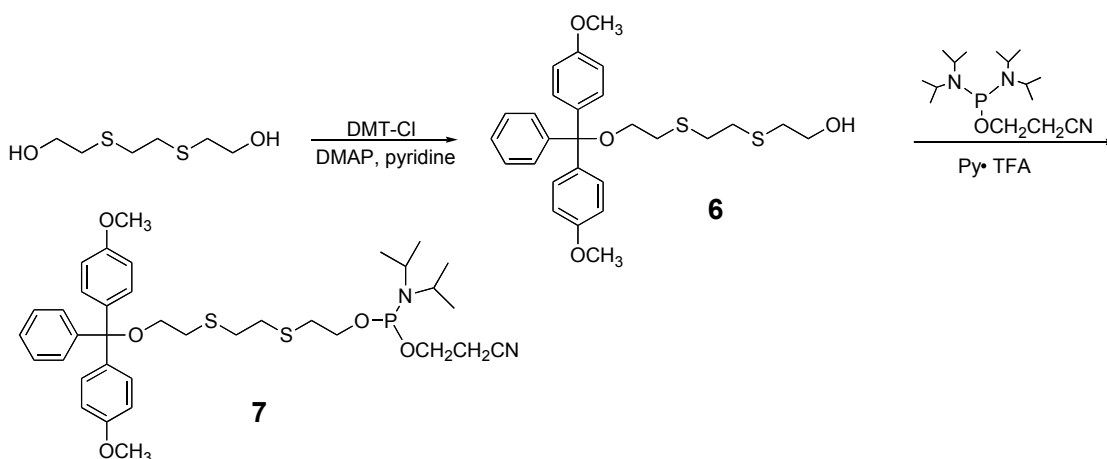

**Compound 6.** 3,6-Dithia-1,8-octanediol (25.6 g, 0.140 mol) and DMAP (0.9 g, 7.0 mmol) were dissolved in dry pyridine (200 mL). DMT-Cl (9.5 g, 28 mmol) was added slowly and the reaction stirred at room temperature for 60 hours. The reaction mixture was poured into aqueous 5%  $NaHCO_3$  and extracted with  $CH_2Cl_2$  (2 x 125 mL). The organic layers were combined, washed twice with saturated aqueous NaCl, dried over  $Na_2SO_4$ , and concentrated in vacuo. The crude product was purified by flash chromatography with a gradient of solvent from 100%  $CH_2Cl_2$  to 5% methanol in  $CH_2Cl_2$ . Yield 3.1 g (23%).  $^1H$  NMR ( $CDCl_3$ , ppm): 2.63 (s, 4H), 2.70-2.74 (t,  $J = 12.01$  Hz, 2H), 3.27-3.31 (t,  $J = 11.87$  Hz, 2H), 3.67-3.71 (t,  $J = 10.4$  Hz, 2H), 3.86 (s, 6H), 6.88-6.91 (d,  $J = 8.79$  Hz, 4H), 7.27-7.35 (m, 3H), 7.39-7.42 (d,  $J = 8.79$  Hz, 4H), 7.50-7.53 (d,  $J = 7.77$  Hz, 2H). MALDI-TOF ( $m/z$ ):  $[M+Na]^+$  calc'd for **6**, 507.16, found, 507.07.

**Compound 7.** To a mixture of (2-cyanoethyl)-*N,N,N',N'*-tetraisopropylphosphorodiamidite (0.85 mL, 2.7 mmol) and **6** (1.03 g, 2.14 mmol) in anhydrous CH<sub>2</sub>Cl<sub>2</sub> was added pyridinium trifluoroacetate (0.56 g, 2.9 mmol). The reaction was stirred for 3 hours at room temperature. The reaction mixture was then poured into aqueous 5% NaHCO<sub>3</sub> and extracted with CH<sub>2</sub>Cl<sub>2</sub> (2 x 30 mL). The organic layers were combined and washed twice with saturated aqueous NaCl, dried over Na<sub>2</sub>SO<sub>4</sub>, and concentrated in vacuo. The crude product was purified by flash chromatography in 1:8 EtOAc/hexanes with 0.25% Et<sub>3</sub>N. Yield, 0.21 g (14%). <sup>1</sup>H NMR (CDCl<sub>3</sub>): 1.25-1.28 (m, 12H), 2.68-2.72 (t, J = 12.9 Hz, 2H), 2.75-2.84 (m, 8H), 3.34-3.39 (t, J = 13.48, 2H), 3.64-3.72 (m, 2H), 3.87 (s, 6H), 3.91-3.96 (m, 4H), 6.90-6.92 (d, J = 8.79 Hz, 4H), 7.29-7.37 (m, 3H), 7.40-7.43 (d, J = 8.79 Hz, 4H), 7.52-7.54 (d, J = 7.62 Hz, 2H). <sup>31</sup>P NMR (CDCl<sub>3</sub>, ppm): 147.99. ESI (*m/z*): [M+Na]<sup>+</sup> calc'd for **7**, 707.27, found, 707.00.

## **Section II. Oligonucleotide Synthesis**

All oligonucleotides were synthesized and purified by reversed phase high performance liquid chromatography (RP-HPLC) at Midland Certified Reagent Company, Inc. Table S1 shows mass spectral data for the six oligonucleotides synthesized.

**Table S1.** Mass spectral data for oligos

| compound    | single nucleotide replacement |         | triple nucleotide replacement |                      |
|-------------|-------------------------------|---------|-------------------------------|----------------------|
|             | calc'd                        | found   | calc'd                        | found                |
| dithioether | 6987.49                       | 6985.42 | 6847.07                       | 6848.97              |
| piperazine  | 6979.58                       | 6976.84 | 6823.35                       | 6823.52              |
| bipyridine  | 7077.50                       | 7078.18 | 7117.30                       | 7168.11 <sup>a</sup> |

<sup>a</sup>mass corresponds to M + 2 Na<sup>+</sup>

## **Section III. UV-Vis Melting Curves**

All melting curves were performed on a Cary 100 UV-Vis equipped with a Cary peltier thermostatable multi-cell holder and a Cary temperature controller. The samples were prepared at 1 μM per oligo concentration in 1.0 mL of 50 mM tris buffer with 50 mM NaCl (pH = 7.4). All samples were treated for 3 hours with Chelex resin to remove trace metals. For melting curves with added metals, the concentration of the metal was 1 μM for the single-nucleotide replacement oligo melting curves, and 3 μM for the three-nucleotide replacement oligo melting curves. The Pt<sup>2+</sup> was generated from PtCl<sub>4</sub><sup>2-</sup> treated with 3.8 equiv AgNO<sub>3</sub>, Pt<sup>4+</sup> was from PtCl<sub>6</sub><sup>2-</sup> treated with 5.8 equiv AgNO<sub>3</sub>, Pd<sup>4+</sup> was from PdCl<sub>6</sub><sup>2-</sup> treated with 5.8 equiv AgNO<sub>3</sub>, Os<sup>4+</sup> was from OsCl<sub>6</sub><sup>2-</sup> treated with 5.8 equiv AgNO<sub>3</sub>, and Cu<sup>2+</sup> was from Cu(NO<sub>3</sub>)<sub>2</sub>. All samples were degassed with a stream of helium and topped with a layer of silicon oil prior to data collection. The absorbance was monitored at 260 nm as a function of temperature from 85 °C to 5 °C followed by reheating to 85 °C at 0.5 °C per minute. Melting temperatures were determined from the 85 °C to 5 °C curve.
